# Supplementary material for: Spatial-Temporal Dynamics of Gas Consumption in England and Wales: Assessing the Residential Sector Using Sequence Analysis
Source: Springer Nature journal article supplement (doi:10.1007/s12061-024-09584-9), 2024-06-20
Supplement: 12061_2024_9584_MOESM1_ESM.pdf [file 12061_2024_9584_MOESM1_ESM.pdf]

## Supplementary Material

Gas consumption for 2017 was removed, as Xoserve opted for a new data collection system in 2016. Meters which had not reported their consumptions (non-consuming meters) for a number of years had their total annual quantity updated, which resulted in a significant rise in the total annual quantity reported for that year (BEIS, 2022d. Pg., 13). Supplementary Figure 1 sees the state distribution plot which included the 2017 data, where a break in trend for this year is identified. This methodological change means the total annual consumption across all meters is not comparable to previous years. However, this analysis only measures the median change of gas in consuming meters, rather than the change in the total annual quantity between areas. Due to these methodological changes creating a significant break in our trends at 2017 we opted to remove this data, resulting in the spatial-temporal analysis concerning 2010 – 2016 and 2018 – 2020.

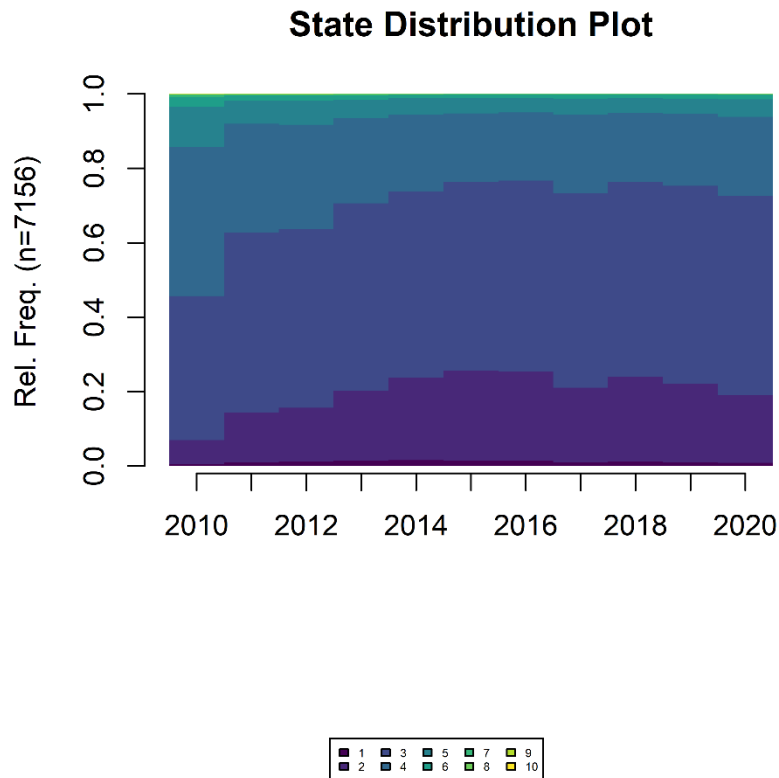

**Supplementary figure 1:** State distribution plot containing 2017 data  
**Data Source:** BEIS, 2022c
